# Supplementary material for: IndiGenomes: a comprehensive resource of genetic variants from over 1000 Indian genomes
Source: PubMed Central journal article supplement — Nucleic Acids Res. 2020 Oct 23;49(D1):D1225–32. doi: 10.1093/nar/gkaa923 (PMC7778947; doi:10.1093/nar/gkaa923), 2020-10-23
Supplement: gkaa923_supplemental_file.pdf [file gkaa923_supplemental_file.pdf]

## SUPPLEMENTARY MATERIAL

| <b>S. No.</b> | <b>State</b>         | <b>Number of samples subjected to WGS</b> |
|---------------|----------------------|-------------------------------------------|
| 1             | Andhra Pradesh       | 19                                        |
| 2             | Assam                | 32                                        |
| 3             | Bihar                | 44                                        |
| 4             | Chattisgarh          | 7                                         |
| 5             | Delhi                | 33                                        |
| 6             | Gujarat              | 32                                        |
| 7             | Haryana              | 27                                        |
| 8             | Himachal Pradesh     | 9                                         |
| 9             | Jammu and Kashmir    | 22                                        |
| 10            | Jharkhand            | 26                                        |
| 11            | Karnataka            | 13                                        |
| 12            | Kerala               | 78                                        |
| 13            | Madhya Pradesh       | 38                                        |
| 14            | Maharashtra          | 100                                       |
| 15            | Manipur              | 14                                        |
| 16            | Mizoram              | 20                                        |
| 17            | Nagaland             | 28                                        |
| 18            | Odisha               | 111                                       |
| 19            | Punjab               | 16                                        |
| 20            | Rajasthan            | 47                                        |
| 21            | Tamil Nadu           | 70                                        |
| 22            | Telangana            | 83                                        |
| 23            | Tripura              | 2                                         |
| 24            | Uttar Pradesh        | 120                                       |
| 25            | Uttarakhand          | 11                                        |
| 26            | Uttaranchal          | 2                                         |
| 27            | West Bengal          | 25                                        |
|               | <b>Total Samples</b> | <b>1029</b>                               |

**Supplementary Data 1:** Table showing the number of participants volunteered from each state of India.

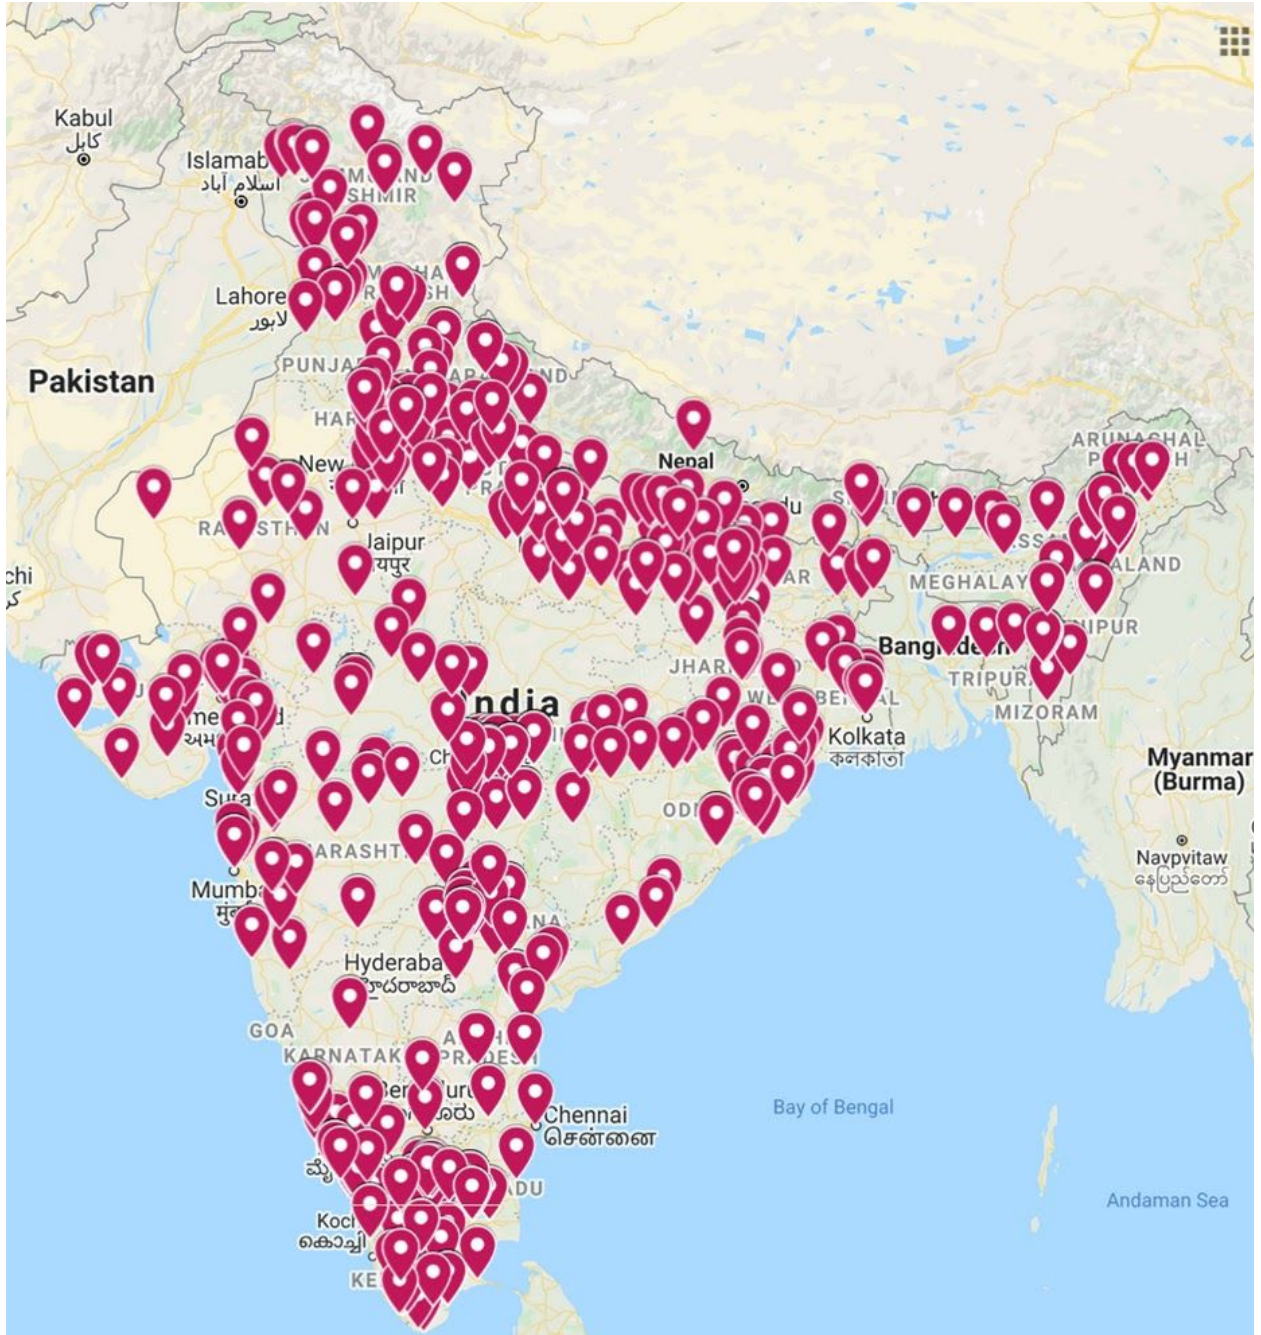

**Supplementary Data 2:** Map of India showing the geographical location of the sampled individuals.
